# Supplementary material for: Effects of Sodium Hexametaphosphate and Fluoride on the pH and Inorganic Components of Streptococcus mutans and Candida albicans Biofilm after Sucrose Exposure
Source: MDPI journal article supplement (doi:10.3390/antibiotics11081044), 2022-08-03
Supplement: s1 [file s1]

## Supplementary Materials

Table S1. CRIS checklist for reporting in-vitro studies based on previously guidelines \*.

| Section/topic                           | Checklist item                                                                                                                                                                                         |                |
|-----------------------------------------|--------------------------------------------------------------------------------------------------------------------------------------------------------------------------------------------------------|----------------|
| <b>Abstract</b>                         | Item 1. Structured summary of trial design, methods, results, and conclusions                                                                                                                          | Yes            |
| <b>Introduction</b>                     |                                                                                                                                                                                                        |                |
| <i>Background and objectives</i>        | Item 2a. Scientific background and explanation of rationale                                                                                                                                            | Yes            |
|                                         | Item 2b. Specific objectives and/or hypotheses                                                                                                                                                         | Yes            |
| <b>Methods</b>                          |                                                                                                                                                                                                        |                |
| <i>Intervention</i>                     | Item 3. The intervention for each group, including how and when it was administered, with sufficient detail to enable replication                                                                      | Yes            |
| <i>Outcomes</i>                         | Item 4. Completely defined, pre-specified primary and secondary measures of outcome, including how and when they were assessed                                                                         | Yes            |
| <i>Sample size</i>                      | Item 5. How sample size was determined                                                                                                                                                                 | Yes            |
| <i>Randomization:</i>                   |                                                                                                                                                                                                        |                |
| <i>Sequence generation</i>              | Item 6. Method used to generate the random allocation sequence                                                                                                                                         | Not applicable |
| <i>Allocation concealment mechanism</i> | Item 7. Mechanism used to implement the random allocation sequence (for example, sequentially numbered containers), describing any steps taken to conceal the sequence until intervention was assigned | Not applicable |
| <i>Implementation</i>                   | Item 8. Who generated the random allocation sequence, who enrolled teeth, and who assigned teeth to intervention                                                                                       | Not applicable |
| <i>Blinding</i>                         | Item 9. If done, who was blinded after assignment to intervention (for example, care providers, those assessing outcomes), and how                                                                     | Not applicable |
| <i>Statistical methods</i>              | Item 10. Statistical methods used to compare groups for primary and secondary outcomes                                                                                                                 | Yes            |
| <b>Results</b>                          |                                                                                                                                                                                                        |                |
| <i>Outcomes and estimation</i>          | Item 11. For each primary and secondary outcome, results for each group, and the estimated size of the effect and its precision (for example 95% confidence interval)                                  | Yes            |
| <b>Discussion</b>                       |                                                                                                                                                                                                        |                |
| <i>Limitations</i>                      | Item 12. Trial limitations, addressing sources of potential bias, imprecision, and, if relevant, multiplicity of analyses                                                                              | Yes            |
| <b>Other information</b>                |                                                                                                                                                                                                        |                |
| <i>Funding</i>                          | Item 13. Sources of funding and other support (for example suppliers of drugs), role of funders                                                                                                        | Yes            |
| <i>Protocol</i>                         | Item 14. Where the full trial protocol can be accessed, if available                                                                                                                                   | Yes            |

\* <https://doi.org/10.1016/j.jebdp.2012.10.001> (accessed on 23 July 2022). \* <https://pubmed.ncbi.nlm.nih.gov/25125839/> (accessed on 23 July 2022).
